# Supplementary material for: Ethnic Minorities’ Experiences of Cardiac Rehabilitation: A Scoping Review
Source: MDPI journal article supplement (doi:10.3390/healthcare11050757), 2023-03-04
Supplement: s1 [file s1]

**CASP Checklist:** 10 questions to help you make sense of a **Qualitative** research

**How to use this appraisal tool:** Three broad issues need to be considered when appraising a qualitative study:

-  Are the results of the study valid? (Section A)
-  What are the results? (Section B)
-  Will the results help locally? (Section C)

The 10 questions on the following pages are designed to help you think about these issues systematically. The first two questions are screening questions and can be answered quickly. If the answer to both is “yes”, it is worth proceeding with the remaining questions. There is some degree of overlap between the questions, you are asked to record a “yes”, “no” or “can’t tell” to most of the questions. A number of italicised prompts are given after each question. These are designed to remind you why the question is important. Record your reasons for your answers in the spaces provided.

**About:** These checklists were designed to be used as educational pedagogic tools, as part of a workshop setting, therefore we do not suggest a scoring system. The core CASP checklists (randomised controlled trial & systematic review) were based on JAMA 'Users' guides to the medical literature 1994 (adapted from Guyatt GH, Sackett DL, and Cook DJ), and piloted with health care practitioners.

For each new checklist, a group of experts were assembled to develop and pilot the checklist and the workshop format with which it would be used. Over the years overall adjustments have been made to the format, but a recent survey of checklist users reiterated that the basic format continues to be useful and appropriate.

**Referencing:** we recommend using the Harvard style citation, i.e.: *Critical Appraisal Skills Programme (2018). CASP (insert name of checklist i.e. Qualitative) Checklist. [online] Available at: URL. Accessed: Date Accessed.*

©CASP this work is licensed under the Creative Commons Attribution – Non-Commercial-Share A like. To view a copy of this license, visit <http://creativecommons.org/licenses/by-nc-sa/3.0/> [www.casp-uk.net](http://www.casp-uk.net)

Paper for appraisal and reference: Astin, F., Atkin, K. and Darr, A. (2008) 'Family support ar

Section A: Are the results valid?

1. Was there a clear statement of the aims of the research?

|            |                                     |
|------------|-------------------------------------|
| Yes        | <input checked="" type="checkbox"/> |
| Can't Tell | <input type="checkbox"/>            |
| No         | <input type="checkbox"/>            |

- HINT: Consider
- what was the goal of the research
  - why it was thought important
  - its relevance

Comments: The study aims to explore the nature of family support available to a sample of South Asian and White-European cardiac patients and to highlight similarities and differences between these groups with regard to cardiac rehabilitation and lifestyle modification.

2. Is a qualitative methodology appropriate?

|            |                                     |
|------------|-------------------------------------|
| Yes        | <input checked="" type="checkbox"/> |
| Can't Tell | <input type="checkbox"/>            |
| No         | <input type="checkbox"/>            |

- HINT: Consider
- If the research seeks to interpret or illuminate the actions and/or subjective experiences of research participants
  - Is qualitative research the right methodology for addressing the research goal

Comments: The study aims to explore the experiences led by participants

Is it worth continuing?

3. Was the research design appropriate to address the aims of the research?

|            |                                     |
|------------|-------------------------------------|
| Yes        | <input checked="" type="checkbox"/> |
| Can't Tell | <input type="checkbox"/>            |
| No         | <input type="checkbox"/>            |

- HINT: Consider
- if the researcher has justified the research design (e.g. have they discussed how they decided which method to use)

Comments: Justification of the research design has been explained

4. Was the recruitment strategy appropriate to the aims of the research?

|            |                                     |
|------------|-------------------------------------|
| Yes        | <input checked="" type="checkbox"/> |
| Can't Tell | <input type="checkbox"/>            |
| No         | <input type="checkbox"/>            |

HINT: Consider

- If the researcher has explained how the participants were selected
- If they explained why the participants they selected were the most appropriate to provide access to the type of knowledge sought by the study
- If there are any discussions around recruitment (e.g. why some people chose not to take part)

**Comments:** potential participants were identified by cardiac rehabilitation nurses from participating centres. The study took place in West Yorkshire, UK and participants were recruited from one of three participating district general hospitals. Approximately 10% of the population which was sampled comprised of people of South Asian origin. Of the 112 potential participants identified, 89 were identified as sufficiently fit by their General Practitioner leaving 65 participants in the final sample. Limited discussion as to why some people did not take part in the study.

5. Was the data collected in a way that addressed the research issue?

|            |                                     |
|------------|-------------------------------------|
| Yes        | <input checked="" type="checkbox"/> |
| Can't Tell | <input type="checkbox"/>            |
| No         | <input type="checkbox"/>            |

HINT: Consider

- If the setting for the data collection was justified
- If it is clear how data were collected (e.g. focus group, semi-structured interview etc.)
- If the researcher has justified the methods chosen
  - If the researcher has made the methods explicit (e.g. for interview method, is there an indication of how interviews are conducted, or did they use a topic guide)
  - If methods were modified during the study. If so, has the researcher explained how and why
  - If the form of data is clear (e.g. tape recordings, video material, notes etc.)
    - If the researcher has discussed saturation of data

**Comments:** Semi-structured interviews were conducted using thematic topic guides to explore key issues. Participants were given the choice of where their interview was conducted and the majority chose their homes. Audio taped interviews lasted between 60 and 90 min.

6. Has the relationship between researcher and participants been adequately considered?

|            |                                     |
|------------|-------------------------------------|
| Yes        | <input checked="" type="checkbox"/> |
| Can't Tell | <input type="checkbox"/>            |
| No         | <input type="checkbox"/>            |

HINT: Consider

- If the researcher critically examined their own role, potential bias and influence during (a) formulation of the research questions (b) data collection, including sample recruitment and choice of location
- How the researcher responded to events during the study and whether they considered the implications of any changes in the research design

**Comments:** There appears to be some evidence of consideration towards bias data concerning data collection, including sample recruitment and choice of location. Participants were given the choice of where their interview was conducted and the majority chose their homes. no implications of any changes in the research design as been raised.

#### Section B: What are the results?

7. Have ethical issues been taken into consideration?

|            |                                     |
|------------|-------------------------------------|
| Yes        | <input checked="" type="checkbox"/> |
| Can't Tell | <input type="checkbox"/>            |
| No         | <input type="checkbox"/>            |

HINT: Consider

- If there are sufficient details of how the research was explained to participants for the reader to assess whether ethical standards were maintained
- If the researcher has discussed issues raised by the study (e.g. issues around informed consent or confidentiality or how they have handled the effects of the study on the participants during and after the study)
- If approval has been sought from the ethics committee

**Comments:** It is unclear of how the research was explained to participants, clarity is required. Discussions around informed consent and confidentiality has been discussed. Approval has been sought for this study from the local ethics committee.

8. Was the data analysis sufficiently rigorous?

|            |                                     |
|------------|-------------------------------------|
| Yes        | <input checked="" type="checkbox"/> |
| Can't Tell | <input type="checkbox"/>            |
| No         | <input type="checkbox"/>            |

HINT: Consider

- If there is an in-depth description of the analysis process
- If thematic analysis is used. If so, is it clear how the categories/themes were derived from the data
- Whether the researcher explains how the data presented were selected from the original sample to demonstrate the analysis process
- If sufficient data are presented to support the findings
  - To what extent contradictory data are taken into account
- Whether the researcher critically examined their own role, potential bias and influence during analysis and selection of data for presentation

Comments: A description of the analysis process has been detailed however requires further in-depth discussions. Transcripts were read and reread by members of the research team and recurrent themes and concepts identified. Sufficient data has been presented to support findings. limited detail of potential bias and influence during analysis and selection of data for presentation has been discussed.

9. Is there a clear statement of findings?

|            |                                     |
|------------|-------------------------------------|
| Yes        | <input checked="" type="checkbox"/> |
| Can't Tell | <input type="checkbox"/>            |
| No         | <input type="checkbox"/>            |

HINT: Consider whether

- If the findings are explicit
- If there is adequate discussion of the evidence both for and against the researcher's arguments
- If the researcher has discussed the credibility of their findings (e.g. triangulation, respondent validation, more than one analyst)
- If the findings are discussed in relation to the original research question

Comments: Clear statement of findings is present with adequate discussion of the evidence both for and against the researcher's arguments in relation to the research question. More than one analyst was used to analysis findings

Section C: Will the results help locally?

10. How valuable is the  
research?

HINT: Consider

- If the researcher discusses the contribution the study makes to existing knowledge or understanding (e.g. do they consider the findings in relation to current practice or policy, or relevant research-based literature
- If they identify new areas where research is necessary
- If the researchers have discussed whether or how the findings can be transferred to other populations or considered other ways the research may be used

**Comments:** The Authors have detailed the contribution the study makes to existing literature in relation to clinical practice. Recommendations for further study has been highlighted within the study. Discussion of how findings can be transferred to other populations has been detailed.
