# Supplementary material for: Ethnic Minorities’ Experiences of Cardiac Rehabilitation: A Scoping Review
Source: MDPI journal article supplement (doi:10.3390/healthcare11050757), 2023-03-04
Supplement: s1 [file s1]

**List of Excluded Studies with reasons for exclusion (n=33)**

|                                               |        |
|-----------------------------------------------|--------|
| Limited focus on study outcome                | (n=7)  |
| Gender Specific outcome                       | (n=1)  |
| Type of Study                                 | (n=6)  |
| Limited focus on the study population outcome | (n=18) |
| Same study participants used in study         | (n=1)  |

| References                                                                                                                                                                                                                                                                                                                                                                        | Reason for Exclusion           |
|-----------------------------------------------------------------------------------------------------------------------------------------------------------------------------------------------------------------------------------------------------------------------------------------------------------------------------------------------------------------------------------|--------------------------------|
| 1. Midence, L., Mola, A., Terzic, C. M., Thomas, R. J., & Grace, S. L. (2014). Ethnocultural diversity in cardiac rehabilitation. <i>Journal of Cardiopulmonary Rehabilitation and Prevention</i> , 34(6), 437–444. <a href="https://doi.org/10.1097/HCR.0000000000000089">https://doi.org/10.1097/HCR.0000000000000089</a>                                                       | Type of study                  |
| 2. Valencia, H. E., Savage, P. D., & Ades, P. A. (2011). Cardiac Rehabilitation Participation in Underserved Populations. <a href="https://doi.org/10.1097/HCR.0b013e318220a7da">https://doi.org/10.1097/HCR.0b013e318220a7da</a>                                                                                                                                                 | Type of study                  |
| 3. <u>Vanzella, L. M.</u> , Oh, P., Pakosh, M., & Ghisi, G. L. M. (2021). Barriers to Cardiac Rehabilitation in Ethnic Minority Groups: A Scoping Review. <i>Journal of Immigrant and Minority Health</i> , 23(4), 824–839. <a href="https://doi.org/10.1007/s10903-021-01147-1">https://doi.org/10.1007/s10903-021-01147-1</a>                                                   | Type of study                  |
| 4. Zhang, L., Gallagher, R., Ding, D., & Neubeck, L. (2018). Self-management Following a Cardiac Event in People of Chinese Ethnicity Living in Western Countries: A Scoping Review. <i>Journal of Immigrant and Minority Health</i> , 20(3), 744–754. <a href="https://doi.org/10.1007/s10903-017-0584-6">https://doi.org/10.1007/s10903-017-0584-6</a>                          | Type of study                  |
| 5. Gupta, S. S., Aroni, R., & Teede, H. (2017). Experiences and Perceptions of Physical Activity among South Asian and Anglo-Australians with Type 2 Diabetes or Cardiovascular Disease: Implications for Clinical Practice. <i>Qualitative Health Research</i> , 27(3), 391–405. <a href="https://doi.org/10.1177/1049732316660690">https://doi.org/10.1177/1049732316660690</a> | Limited focus on study outcome |
| 6. <u>Lord, H.</u> , MacPhail, C., Cherry, J., & Fernandez, R. (2021). Perceptions of Aboriginal and Torres Strait Islander Australians toward cardiovascular primary prevention programs: A qualitative systematic review. <i>Public Health Nursing</i> , 38(2), 197–211. <a href="https://doi.org/10.1111/phn.12837">https://doi.org/10.1111/phn.12837</a>                      | Limited focus on study outcome |

|                                                                                                                                                                                                                                                                                                                                                                                                                                                    |                                               |
|----------------------------------------------------------------------------------------------------------------------------------------------------------------------------------------------------------------------------------------------------------------------------------------------------------------------------------------------------------------------------------------------------------------------------------------------------|-----------------------------------------------|
| 7. Ellis, K. R., Young, T. L., Carthron, D., Simms, M., McFarlin, S., Davis, K. L., Dave, G., Corbie-Smith, G., & Cené, C. (2019). Perceptions of Rural African American Adults About the Role of Family in Understanding and Addressing Risk Factors for Cardiovascular Disease. <i>American Journal of Health Promotion</i> , 33(5), 708–717.<br><a href="https://doi.org/10.1177/0890117118799574">https://doi.org/10.1177/0890117118799574</a> | Limited focus on the study population outcome |
| 8. Bäck, M., Öberg, B., & Krevers, B. (2017). Important aspects in relation to patients' attendance at exercise-based cardiac rehabilitation - facilitators, barriers, and physiotherapist's role: A qualitative study. <i>BMC Cardiovascular Disorders</i> , 17(1), 1–10.<br><a href="https://doi.org/10.1186/s12872-017-0512-7">https://doi.org/10.1186/s12872-017-0512-7</a>                                                                    | Limited focus on the study population outcome |
| 9. Evans, A. B., & Crust, L. (2015). 'Some of these people aren't as fit as us ...': experiencing the ageing, physically active body in cardiac rehabilitation. <i>Qualitative Research in Sport, Exercise and Health</i> , 7(1), 13–36.<br><a href="https://doi.org/10.1080/2159676X.2014.908945">https://doi.org/10.1080/2159676X.2014.908945</a>                                                                                                | Limited focus on the study population outcome |
| 10. Hanna, A., Yael, E. M., Hadassa, L., Iris, E., Eugenia, N., Lior, G., Carmit, S., & Liora, O. (2020). 'It's up to me with a little support' – Adherence after myocardial infarction: A qualitative study. <i>International Journal of Nursing Studies</i> , 101, 103416.<br><a href="https://doi.org/10.1016/j.ijnurstu.2019.103416">https://doi.org/10.1016/j.ijnurstu.2019.103416</a>                                                        | Limited focus on the study population outcome |
| 11. Jackson, A. M., McKinstry, B., Gregory, S., & Amos, A. (2012). A qualitative study exploring why people do not participate in cardiac rehabilitation and coronary heart disease self-help groups, and their rehabilitation experience without these resources. <i>Primary Health Care Research &amp; Development</i> , 13(1), 30–41.<br><a href="https://doi.org/10.1017/S1463423611000284">https://doi.org/10.1017/S1463423611000284</a>      | Limited focus on the study population outcome |
| 12. Lesage-Moussavou-Nzamba, M., Houle, J., & Trudeau, F. (2020). Participants Perspectives of a Primary Exercise-Based Prevention Program for Cardiac Patients: A Prepost Intervention Qualitative Case Study. <i>Rehabilitation Research and Practice</i> , 2020.<br><a href="https://doi.org/10.1155/2020/6215428">https://doi.org/10.1155/2020/6215428</a>                                                                                     | Limited focus on the study population outcome |
| 13. Madden, M., Furze, G., & Lewin, R. J. P. (2011). Complexities of patient choice in cardiac rehabilitation: Qualitative findings. <i>Journal of Advanced Nursing</i> , 67(3), 540–549.<br><a href="https://doi.org/10.1111/j.1365-2648.2010.05509.x">https://doi.org/10.1111/j.1365-2648.2010.05509.x</a>                                                                                                                                       | Limited focus on the study population outcome |
| 14. Rouleau, C. R., King-shier, K. M., Tomfohr-madsen, L. M., Aggarwal, S. G., Arena, R., Campbell, T. S., Rouleau, C. R., King-shier, K. M.,                                                                                                                                                                                                                                                                                                      | Limited focus on the study population outcome |

|                                                                                                                                                                                                                                                                                                                                                                                   |                                               |
|-----------------------------------------------------------------------------------------------------------------------------------------------------------------------------------------------------------------------------------------------------------------------------------------------------------------------------------------------------------------------------------|-----------------------------------------------|
| Tomfohr-madsen, L. M., Aggarwal, S. G., Arena, R., & Campbell, T. S. (2017). A qualitative study exploring factors that influence enrollment in outpatient cardiac rehabilitation. <i>Disability and Rehabilitation</i> , 0(0), 000.<br><a href="https://doi.org/10.1080/09638288.2016.1261417">https://doi.org/10.1080/09638288.2016.1261417</a>                                 |                                               |
| 15. Saeidi, M., Soroush, A., Komasi, S., Moemeni, K., & Heydarpour, B. (2015). Attitudes toward cardiovascular disease risk factors among patients referred to a cardiac rehabilitation center: Importance of psychological attitudes. <i>Shiraz E Medical Journal</i> , 16(7), 1–3.<br><a href="https://doi.org/10.17795/semj22281">https://doi.org/10.17795/semj22281</a>       | Limited focus on the study population outcome |
| 16. Schröder, S. L., Fink, A., & Richter, M. (2018). Socioeconomic differences in experiences with treatment of coronary heart disease: A qualitative study from the perspective of elderly patients. <i>BMJ Open</i> , 8(11), 1–8. <a href="https://doi.org/10.1136/bmjopen-2018-024151">https://doi.org/10.1136/bmjopen-2018-024151</a>                                         | Limited focus on the study population outcome |
| 17. Hooman Shahsavari <sup>1</sup> , Mohsen Shahriari <sup>2</sup> , Nasrollah Alimohammadi<br>Motivational factors of adherence to cardiac rehabilitation Hooman Shahsavari <sup>1</sup> , Mohsen Shahriari <sup>2</sup> , Nasrollah Alimohammadi                                                                                                                                | Limited focus on the study population outcome |
| 18. Ades, P. A., Khadanga, S., Savage, P. D., & Gaalema, D. E. (2022). Enhancing participation in cardiac rehabilitation: Focus on underserved populations. <i>Progress in Cardiovascular Diseases</i> , 70, 102–110. <a href="https://doi.org/10.1016/j.pcad.2022.01.003">https://doi.org/10.1016/j.pcad.2022.01.003</a>                                                         | Type of study                                 |
| 19. Chauhan, U. et al. (2010) 'Improving Care in Cardiac Rehabilitation for Minority Ethnic Populations', <i>European Journal of Cardiovascular Nursing</i> , 9(4), pp. 272–277. doi: 10.1016/j.ejcnurse.2010.03.004.                                                                                                                                                             | Limited focus on the study population outcome |
| 20. Brown, A. (2010). Acute Coronary Syndromes in Indigenous Australians: Opportunities for Improving Outcomes Across the Continuum of Care. <i>Heart Lung and Circulation</i> , 19(5–6), 325–336.<br><a href="https://doi.org/10.1016/j.hlc.2010.02.011">https://doi.org/10.1016/j.hlc.2010.02.011</a>                                                                           | Limited focus on the study population outcome |
| 21. Galdas, P. M., Oliffe, J. L., Wong, S. T., Ratner, P. A., Johnson, J. L., & Kelly, M. T. (2012). Canadian Punjabi Sikh men's experiences of lifestyle changes following myocardial infarction: Cultural connections. <i>Ethnicity and Health</i> , 17(3), 253–266.<br><a href="https://doi.org/10.1080/13557858.2011.610440">https://doi.org/10.1080/13557858.2011.610440</a> | Gender specific                               |

|                                                                                                                                                                                                                                                                                                                                                                                                                                                                                                                                                                                                       |                                               |
|-------------------------------------------------------------------------------------------------------------------------------------------------------------------------------------------------------------------------------------------------------------------------------------------------------------------------------------------------------------------------------------------------------------------------------------------------------------------------------------------------------------------------------------------------------------------------------------------------------|-----------------------------------------------|
| 22. Grewal, K., Leung, Y. W., Safai, P., Stewart, D. E., Anand, S., Gupta, M., Parsons, C., & Grace, S. L. (2010). Access to cardiac rehabilitation among South-asian patients by referral method: A qualitative study. <i>Rehabilitation Nursing</i> , 35(3), 106–112. <a href="https://doi.org/10.1002/j.2048-7940.2010.tb00285.x">https://doi.org/10.1002/j.2048-7940.2010.tb00285.x</a>                                                                                                                                                                                                           | Limited focus on the study population outcome |
| 23. Gupta, S. S., Aroni, R., & Teede, H. (2017). Experiences and Perceptions of Physical Activity among South Asian and Anglo-Australians with Type 2 Diabetes or Cardiovascular Disease: Implications for Clinical Practice. <i>Qualitative Health Research</i> , 27(3), 391–405. <a href="https://doi.org/10.1177/1049732316660690">https://doi.org/10.1177/1049732316660690</a>                                                                                                                                                                                                                    | Limited focus on study outcome                |
| 24. Jin, K., Neubeck, L., Koo, F., Ding, D., & Gullick, J. (2020). Understanding Prevention and Management of Coronary Heart Disease Among Chinese Immigrants and Their Family Carers: A Socioecological Approach. <i>Journal of Transcultural Nursing</i> , 31(3), 257–266. <a href="https://doi.org/10.1177/1043659619859059">https://doi.org/10.1177/1043659619859059</a>                                                                                                                                                                                                                          | Limited focus on study outcome                |
| 25. Maddocks, S., & Cobbing, S. (2017). Patients' experiences of and perspectives on phase 1 cardiac rehabilitation after coronary artery bypass graft surgery. <i>Physiotherapy Canada</i> , 69(4), 333–340. <a href="https://doi.org/10.3138/ptc.2016-39GH">https://doi.org/10.3138/ptc.2016-39GH</a>                                                                                                                                                                                                                                                                                               | Limited focus on study outcome                |
| 26. Nielsen, L. S., Angus, J. E., Lapum, J., Dale, C., Kramer-Kile, M., Abramson, B., Marzolini, S., Oh, P., Price, J., & Clark, A. (2012). "I can't just follow any particular textbook": Immigrants in cardiac rehabilitation. <i>Journal of Advanced Nursing</i> , 68(12), 2719–2729. <a href="https://doi.org/10.1111/j.1365-2648.2012.05975.x">https://doi.org/10.1111/j.1365-2648.2012.05975.x</a>                                                                                                                                                                                              | Limited focus on the study population outcome |
| 27. Piepoli, M. F., Corrà, U., Benzer, W., Bjarnason-Wehrens, B., Dendale, P., Gaita, D., McGee, H., Mendes, M., Niebauer, J., Zwisler, A. D. O., & Schmid, J. P. (2010). Secondary prevention through cardiac rehabilitation: From knowledge to implementation. A position paper from the cardiac rehabilitation section of the European association of cardiovascular prevention and rehabilitation. <i>European Journal of Cardiovascular Prevention and Rehabilitation</i> , 17(1), 1–17. <a href="https://doi.org/10.1097/HJR.0b013e3283313592">https://doi.org/10.1097/HJR.0b013e3283313592</a> | Type of paper                                 |
| 28. Poh, R., Ng, H. N., Loo, G., Ooi, L. S., Yeo, T. J., Wong, R., & Lee, C. H. (2015). Cardiac Rehabilitation after Percutaneous Coronary Intervention in a Multiethnic Asian Country:                                                                                                                                                                                                                                                                                                                                                                                                               | Limited focus on the study population outcome |

|                                                                                                                                                                                                                                                                                                                                                                                                    |                                               |
|----------------------------------------------------------------------------------------------------------------------------------------------------------------------------------------------------------------------------------------------------------------------------------------------------------------------------------------------------------------------------------------------------|-----------------------------------------------|
| Enrollment and Barriers. Archives of Physical Medicine and Rehabilitation, 96(9), 1733–1738.<br><a href="https://doi.org/10.1016/j.apmr.2015.05.020">https://doi.org/10.1016/j.apmr.2015.05.020</a>                                                                                                                                                                                                |                                               |
| 29. Scotto, C. J., Waechter, D., & Rosneck, J. (2011). Factors affecting program completion in phase II cardiac rehabilitation. <i>Canadian Journal of Cardiovascular Nursing = Journal Canadien En Soins Infirmiers Cardio-Vasculaires</i> , 21(2), 15–20.                                                                                                                                        | Limited focus on study outcome                |
| 30. Tuomisto, S., Koivula, M., Åstedt-Kurki, P., & Helminen, M. (2018). Family involvement in rehabilitation: Coronary artery disease—patients' perspectives. <i>Journal of Clinical Nursing</i> , 27(15–16), 3020–3031. <a href="https://doi.org/10.1111/jocn.14494">https://doi.org/10.1111/jocn.14494</a>                                                                                       | Limited focus on the study population outcome |
| 31. Vilchinsky, N., Reges, O., Leibowitz, M., Khaskia, A., Mosseri, M., & Kark, J. D. (2018). Symptoms of Depression and Anxiety as Barriers to Participation in Cardiac Rehabilitation Programs among Arab and Jewish Patients in Israel. <i>Journal of Cardiopulmonary Rehabilitation and Prevention</i> , 38(3), 163–169.                                                                       | Limited focus on study outcome                |
| 32. Darr, A., Astin, F., & Atkin, K. (2008). Causal attributions, lifestyle change, and coronary heart disease: Illness beliefs of patients of South Asian and European origin living in the United Kingdom. <i>Heart and Lung: Journal of Acute and Critical Care</i> , 37(2), 91–104.<br><a href="https://doi.org/10.1016/j.hrtlng.2007.03.004">https://doi.org/10.1016/j.hrtlng.2007.03.004</a> | Same study participants used in study         |
| 33. Yates, B. C., Vazquez Hernandez, M. L., Rowland, S. A., Bainter, D. E., Schulz, P., & Hanson, C. K. (2018). A Qualitative Study of Experiences of Participants in Cardiac Rehabilitation. <i>Journal of Cardiopulmonary Rehabilitation and Prevention</i> , 38(4), E6–E9.<br><a href="https://doi.org/10.1097/HCR.0000000000000317">https://doi.org/10.1097/HCR.0000000000000317</a>           | Limited focus on the study population outcome |
