# Supplementary material for: Ethnic Minorities’ Experiences of Cardiac Rehabilitation: A Scoping Review
Source: MDPI journal article supplement (doi:10.3390/healthcare11050757), 2023-03-04
Supplement: s1 [file s1]

### **Screening and Selection Tool**

**Review Question:** How effective is Cardiac Rehabilitation programs for the ethnic minority patients based on individuals' experiences.

**Population** - Male and Female ethnic minority patients aged 18 > who experience any clinical cardiac injury/event

**Intervention** -Any Cardiac rehabilitation programs / Activities/ intervention /services given for the after care and recovery of any cardiac injury/ event which requires cardiac rehabilitation

**Comparison**-N/A

**Outcome**- Personal experiences of attending CR services

**Setting**- Any clinical, community, hospital, health program, care centre, institutions environments

**Study Designs**- Qualitative study designs only

**Reviewer Name and Date:** Author 1, 20/10/22

**Title of study and citation:** 1. Dilla, D., Ian, J., Martin, J., Michelle, H., & Felicity, A. (2020). "I don't do it for myself, I do it for them": A grounded theory study of South Asians' experiences of making lifestyle change after myocardial infarction. *Journal of Clinical Nursing*, 29(19–20), 3687–3700. <https://doi.org/10.1111/jocn.15395>

## Appendix B

### Screening and Selection Tool Part B

\*Tick the appropriate box when screening and selecting studies for inclusion (Yes, No Unsure or Exclude)

|                         |                                                                                                                                                                                                                                                                        |                                           |                                                                                                                                                                                                                                                                           |
|-------------------------|------------------------------------------------------------------------------------------------------------------------------------------------------------------------------------------------------------------------------------------------------------------------|-------------------------------------------|---------------------------------------------------------------------------------------------------------------------------------------------------------------------------------------------------------------------------------------------------------------------------|
| <b>Population</b>       | Include if the study involves Male and Female ethnic minority patients aged 18 > who experience any clinical cardiac injury/event<br><b>Include</b> <input checked="" type="checkbox"/>                                                                                | <b>Unsure</b><br><input type="checkbox"/> | Exclude if the study involves Male and Female patients originating from non-ethnic backgrounds aged below 18 years who experience other non-cardiac injury/event.<br><b>Exclude</b> <input type="checkbox"/>                                                              |
| <b>Intervention</b>     | Include if the study involves attendees to Cardiac rehabilitation programs / Activities/ intervention /services given for the after care and recovery of any cardiac event which requires cardiac rehabilitation<br><b>Include</b> <input checked="" type="checkbox"/> | <b>Unsure</b><br><input type="checkbox"/> | Exclude if the study does not involve attendees to any Cardiac rehabilitation programs / Activities/ intervention or services given for the after care and recovery of any cardiac event which requires cardiac rehabilitation<br><b>Exclude</b> <input type="checkbox"/> |
| <b>Comparison</b>       | NA                                                                                                                                                                                                                                                                     | NA                                        | NA                                                                                                                                                                                                                                                                        |
| <b>Outcomes</b>         | Include if the study discusses personal experiences of attending CR services for ethnic minority patients<br><b>Include</b> <input checked="" type="checkbox"/>                                                                                                        | <b>Unsure</b><br><input type="checkbox"/> | Exclude if the study does not discuss or provides limited or no detail of personal experiences of attending CR services for ethnic minority patients or if the outcome of the study is age and gender specific.<br><b>Exclude</b> <input type="checkbox"/>                |
| <b>Setting</b>          | Include if the setting of study has been conducted in any country in any clinical, community, hospital, health program, care centre or institutions environments<br><b>Include</b> <input checked="" type="checkbox"/>                                                 | <b>Unsure</b><br><input type="checkbox"/> | Exclude if the setting of study has not been conducted in any clinical, community, hospital, health program, care centre or institutions environments or does not state<br><b>Exclude</b> <input type="checkbox"/>                                                        |
| <b>Study Design</b>     | Include if the study design provides qualitative data<br><b>Include</b> <input checked="" type="checkbox"/>                                                                                                                                                            | <b>Unsure</b><br><input type="checkbox"/> | Exclude if the study design does not provide qualitative data.<br><b>Exclude</b> <input type="checkbox"/>                                                                                                                                                                 |
| <b>Overall Decision</b> | <b>Include</b> <input checked="" type="checkbox"/>                                                                                                                                                                                                                     |                                           | <b>Exclude</b> <input type="checkbox"/>                                                                                                                                                                                                                                   |
| <b>Notes</b>            | Limited data on personal CR experiences                                                                                                                                                                                                                                |                                           |                                                                                                                                                                                                                                                                           |

Template example revised and taken from Boland, A., Cherry, M.G. and Dickson, R. (2017) *Doing A Systematic Review A Students Guide*. 2nd edn. London: Sage Publications.
