# Supplementary material for: Ethnic Minorities’ Experiences of Cardiac Rehabilitation: A Scoping Review
Source: MDPI journal article supplement (doi:10.3390/healthcare11050757), 2023-03-04
Supplement: s1 [file s1]

## Inclusion Exclusion Criteria

| Inclusion criteria                                                                                                                                                                                                  | Exclusion criteria                                                               |
|---------------------------------------------------------------------------------------------------------------------------------------------------------------------------------------------------------------------|----------------------------------------------------------------------------------|
| All Articles in English                                                                                                                                                                                             | Articles not in English language                                                 |
| Qualitative Studies                                                                                                                                                                                                 | Quantitative studies                                                             |
| Ethnic minority individuals including individuals of American Indian, Asian, Black or African American, Hispanic and White having origins in any of the original peoples of Europe, the middle East or North Africa | Studies not explicitly outlining the experiences of ethnic minority individuals. |
| Studies with explicit mention of CR reporting on an aspect of Cardiovascular rehabilitation                                                                                                                         | Studies not explicitly reporting on an aspect of cardiovascular rehabilitation.  |
| Studies reporting primary data                                                                                                                                                                                      | Studies not reporting primary data (e.g. systematic reviews.                     |
