# Supplementary material for: Ethnic Minorities’ Experiences of Cardiac Rehabilitation: A Scoping Review
Source: Healthcare (Basel). 2023 Mar 4;11(5):757. doi: 10.3390/healthcare11050757 (PMC10000677; doi:10.3390/healthcare11050757)
Supplement: Supplementary file 1 [file healthcare-11-00757-s001.zip]

Archive with 4 entries (4 files):
- Astin, et al, 2008 -CASP Checklist Supp File 2.pdf
- Inclusion criteria.pdf
- List of Excluded Studies with reasons for exclusion.pdf
- Screening and Selection Tool.pdf
